1 ***Plasmodium falciparum* infection during pregnancy impairs fetal head growth: prospective**  
2 **and populational-based retrospective studies**

3

4 Jamille Gregório Dombrowski<sup>1</sup>, Rodrigo Medeiros de Souza<sup>1,2</sup>, Flávia Afonso Lima<sup>1</sup>, Carla Letícia  
5 Bandeira<sup>1</sup>, Oscar Murillo<sup>1</sup>, Douglas de Sousa Costa<sup>1</sup>, Erika Paula Machado Peixoto<sup>1</sup>, Marielton dos  
6 Passos Cunha<sup>3</sup>, Paolo Marinho de Andrade Zanotto<sup>3</sup>, Estela Bevilacqua<sup>4</sup>, Marcos Augusto Grigolin  
7 Grisotto<sup>5,6</sup>, Antonio Carlos Pedroso de Lima<sup>7</sup>, Julio da Motta Singer<sup>7</sup>, Susana Campino<sup>8</sup>, Taane  
8 Gregory Clark<sup>8,9</sup>, Sabrina Epiphany<sup>10</sup>, Lígia Antunes Gonçalves<sup>1, #, \*</sup>, Cláudio Romero Farias  
9 Marinho<sup>1, #, \*</sup>

10

11 <sup>1</sup> Department of Parasitology, Institute of Biomedical Sciences, University of São Paulo, São  
12 Paulo, Brazil

13 <sup>2</sup> Multidisciplinary Center, Federal University of Acre, Acre, Brazil

14 <sup>3</sup> Department of Microbiology, Institute of Biomedical Sciences, University of São Paulo, São  
15 Paulo, Brazil

16 <sup>4</sup> Department of Cell and Developmental Biology, Institute of Biomedical Sciences, University of  
17 São Paulo, São Paulo, Brazil

18 <sup>5</sup> CEUMA University, Maranhão, Brazil

19 <sup>6</sup> Florence Institute, Maranhão, Brazil

20 <sup>7</sup> Department of Statistics, Institute of Mathematics and Statistics, University of São Paulo, São  
21 Paulo, Brazil

22 <sup>8</sup> Faculty of Infectious and Tropical Diseases, London School of Hygiene & Tropical Medicine,  
23 London, United Kingdom

24 <sup>9</sup> Faculty of Epidemiology and Population Health, London School of Hygiene & Tropical  
25 Medicine, London, United Kingdom

26 <sup>10</sup> Department of Clinical and Toxicological Analyses, School of Pharmaceutical Sciences,  
27 University of São Paulo, São Paulo, Brazil

28 # These authors are joint senior authors on this work.

29 \* Corresponding authors:

30 Claudio Romero Farias Marinho, PhD

31 e-mail: [marinho@usp.br](mailto:marinho@usp.br)

32 Lígia Antunes Gonçalves, PhD

33 e-mail: [lig.antunes.goncalves@gmail.com](mailto:lig.antunes.goncalves@gmail.com)

34

35 Department of Parasitology, Institute of Biomedical Sciences - ICB

36 University of Sao Paulo - USP

37 Av. Prof. Lineu Prestes, 1374

38 São Paulo - SP – Brazil - 05508-900

39 Fone: +55(11)30917209 (Laboratory); +55(11)30917417 (Fax)

40

41 **Short Title:** Malaria impairs fetal head growth

42

43

44 **Keywords:** global health, epidemiology, pregnancy, newborn, placental malaria, small head

45 **ABSTRACT**

46 **Background:** Malaria in pregnancy is associated with adverse effects on the fetus and newborns.  
47 However, the outcome on a newborn's head circumference (HC) is still unclear. Here, we show the  
48 relation of malaria during pregnancy with fetal head growth.

49 **Methods:** Clinical and anthropometric data were collected from babies in two cohort studies of  
50 malaria-infected and non-infected pregnant women, in the Brazilian Amazon. One enrolled  
51 prospectively (PCS, Jan. 2013 to April 2015) through volunteer sampling, and followed until  
52 delivery, 600 malaria-infected and non-infected pregnant women. The other assembled  
53 retrospectively (RCS, Jan. 2012 to Dec. 2013) clinical and malaria data from 4697 pregnant women  
54 selected through population-based sampling. The effects of malaria during pregnancy in the  
55 newborns were assessed using a multivariate logistic regression. According with World Health  
56 Organization guidelines babies were classified in small head ( $HC < 1$  SD below the median) and  
57 microcephaly ( $HC < 2$  SD below the median) using international HC standards.

58 **Results:** Analysis of 251 (PCS) and 232 (RCS) malaria-infected, and 158 (PCS) and 3650 (RCS)  
59 non-infected women with clinical data and anthropometric measures of their babies was performed.  
60 Among the newborns, 70 (17.1%) in the PCS and 934 (24.1%) in the RCS presented with a small  
61 head (SH). Of these, 15 (3.7%) and 161 (4.2%), respectively, showed microcephaly (MC). The  
62 prevalence of newborns with a SH (30.7% in PCS and 36.6% in RCS) and MC (8.1% in PCS and  
63 7.3% in RCS) was higher among babies born from women infected with *Plasmodium falciparum*  
64 during pregnancy. Multivariate logistic regression analyses revealed that *P. falciparum* infection  
65 during pregnancy represents a significant increased odds for the occurrence of a SH in newborns  
66 (PCS: OR 3.15, 95% CI 1.52-6.53,  $p=0.002$ ; RCS: OR 1.91, 95% CI 1.21-3.04,  $p=0.006$ ). Similarly,  
67 there is an increased odds of MC in babies born from mothers that were *P. falciparum*-infected  
68 (PCS: OR 5.09, 95% CI 1.12-23.17,  $p=0.035$ ). Moreover, characterization of placental pathology  
69 corroborates the association analysis, particularly through the occurrence of more syncytial nuclear

70 aggregates and inflammatory infiltrates in placentas from babies with the reduced head  
71 circumference.

72 **Conclusions:** This work indicates that falciparum-malaria during pregnancy presents an increased  
73 likelihood of occurring reduction of head circumference in newborns, which is associated with  
74 placental malaria.

75 **Trial Registration:** registered as RBR-3yrqfq in the Brazilian Clinical Trials Registry

76

## 77 BACKGROUND

78 Malaria remains a major global health problem, with approximately one billion people living at  
79 high-risk of being infected [1]. *Plasmodium* spp. infection impacts the health of the poorest and  
80 marginalized communities in the endemic countries, particularly in infants and pregnant women,  
81 with around 125 million pregnancies at risk of infection each year [2]. Malaria during pregnancy,  
82 especially falciparum-malaria, can be devastating and fulminant, leading to high mortality for both  
83 mother and fetus [3]. During pregnancy, the infected erythrocytes accumulate and sequester in the  
84 placental intervillous space, causing placental histopathological changes, which triggers an  
85 exacerbated inflammatory response that is highly detrimental [4]. The deleterious effects caused by  
86 malaria infection during pregnancy depend on various factors, such as the woman's immunity, the  
87 number of previous pregnancies and the trimester of gestation, with primigravida and  
88 secundigravida women most susceptible and suffering the greatest consequences [5].  
89 A heightened inflammatory response perturbs the maternal-fetal interface and impairs critical  
90 placental functions. Therefore, maternal malaria presents a major impact on fetus and newborns,  
91 being the main cause of abortion, stillbirth, premature delivery and fetal death in malaria-endemic  
92 countries [3]. Low birth weight (LBW) caused by prematurity or intrauterine growth retardation  
93 (IUGR) is commonly observed in babies born from mothers who had malaria during pregnancy,  
94 contributing to around 100,000 infant deaths each year [3,5,6]. Additionally, *in utero* exposure to  
95 malaria parasites has been shown to impact the fetus or newborn head circumference (HC), a  
96 proportional reduction as an outcome of the IUGR [7,8]. Albeit, no further studies have tried to  
97 unpick a specific disproportionate HC reduction associated with malaria during pregnancy.  
98 Several studies have reported the association of intrauterine infections with a high risk of the  
99 newborn to have LBW and brain injury [9]. A group of microorganisms designated as TORCH, an  
100 abbreviation for *Toxoplasma*, rubella, cytomegalovirus, and Herpes simplex that now also comprise  
101 *T. pallidum* (Syphilis), hepatitis virus, and HIV, and recently, the Zika virus are frequently  
102 associated with reduced HC in newborns [10,11]. The more adverse consequence that results from

103 these infections is microcephaly at birth, which is defined by a reduction of the occipitofrontal HC  
104 of more than two standard deviations (SD) below the median compared to age and sex-matched  
105 control population [12]. Although the brain insult is defined by the cranium size, it also reflects a  
106 reduction of the brain volume and an impairment of cognitive abilities [12].  
107 Thus, to investigate the relation of malaria during pregnancy on the fetus head growth, we analyzed  
108 data from a prospective and a retrospective cohort from newborns delivered between 2012 and 2015  
109 in Cruzeiro do Sul (Acre State in the Southwestern Brazilian Amazon Basin), where 46% of the  
110 total falciparum-malaria Brazilian cases occur [13,14].

## 111 **METHODS**

### 112 **Setting**

113 Two cohort studies were conducted in the Amazonian region of the “Alto do Juruá” valley (Acre,  
114 Brazil), evaluating maternal-child pairs data of births at the general maternity ward, Hospital da  
115 Mulher e da Criança do Juruá (HM CJ, Cruzeiro do Sul), where approximately 90% of the total  
116 deliveries in the region occur. “Alto do Juruá” valley is in the extreme southwest of the Brazilian  
117 Amazon Basin, covering an area of 74,965 km<sup>2</sup>, predominantly rainforest, and a population of  
118 ~200,000 inhabitants. It is limited to the north by the Amazonas state, to the east by the Acre Valley  
119 (Acre), and to the south and west by Peru (Fig. 1). This is a region of high malaria endemicity in  
120 Brazil, with an annual parasite incidence above 100, where *P. vivax* is responsible for 70-80% of  
121 the malaria cases, and where 46% of the total *P. falciparum* Brazilian cases occur [14,15]. In this  
122 region, 18% of women acquire *Plasmodium* infection during pregnancy [13].

123

### 124 **Prospective cohort study (PCS)**

#### 125 **▪ Design and participants**

126 A total of 600 pregnant women were enrolled through volunteer sampling of equal numbers of *P.*  
127 *falciparum*-, *P. vivax*-infected, and non-infected pregnant women, and followed until delivery,  
128 between January 2013 and April 2015. The women were recruited during their first pregnancy visit  
129 to the antenatal care (ANC) clinic. Each pregnant woman was followed by a trained nurse, which  
130 involved at least two domiciliary visits, at the second and third trimester, to monitor their clinical  
131 state, in addition to the usual prenatal care in health care services.

#### 132 **▪ Samples collection**

133 At the time of recruitment, data was collected on socioeconomic, clinical, and obstetric variables,  
134 and peripheral blood and thick and thin blood smears were used to diagnose and confirm malaria  
135 infection. During the domiciliary visits, clinical and obstetric data were obtained, and collected a  
136 peripheral blood sample. An additional blood sample was collected in each episode of malaria

137 during pregnancy. At the time of delivery, clinical data were collected from mother and newborn, as  
138 well as a placental biopsy and blood samples.

139 **▪ Samples processing**

140 The peripheral and placental blood was collected in heparin tubes and then separated into plasma  
141 and whole blood cells using a centrifuge. Thin and thick blood smears were stained with Giemsa.  
142 The placental biopsies were fixed in 10% neutral buffered formalin at 4°C until they could be sent  
143 to the University of São Paulo for processing. Paraffin-embedded 5µm sections of placental tissue  
144 were stained with Hematoxylin-Eosin (H&E) or Giemsa for histological examination. Total DNA  
145 was obtained from whole blood cells using a commercially available extraction kit (QIAmp DNA  
146 Mini Kit, Qiagen), following the manufacturer's instructions.

147 **▪ Gestational age estimation**

148 The gestational age of all women from the PCS was estimated by woman's last menstrual period  
149 (LMP) and adjusted by ultrasound during the first trimester of pregnancy.

150 **▪ Newborns classification according to head circumference**

151 Based on the gestational age, and on the HC size and gender, each newborn from the PCS was  
152 assigned into groups using the INTERGROWTH-21<sup>st</sup> Project [16]. An individual was in a normal  
153 head circumference (NHC) range if their HC was within one SD of the median. Newborns with HC  
154 below one SD below the median were considered to have a small head (SH) [17]. Newborns with  
155 HC below two SD below the median were classified as having microcephaly (MC) [12].

156 **▪ Screening of malaria infection**

157 Malaria during pregnancy was diagnosed from thin and thick blood smears by two experts in  
158 microscopy of the endemic surveillance team of Cruzeiro do Sul (Acre, Brazil). Furthermore, all  
159 samples collected throughout the pregnancy were screened for the presence of malaria parasites, by  
160 microscopy and confirmed by a real-time PCR technique (PET-PCR). This technique detects in  
161 multiplex the *Plasmodium* spp. and *P. falciparum*, and in singleplex *P. vivax* if only *Plasmodium*  
162 spp. is detected in the first PCR. PET-PCR has a detection limit of 3.2 parasites/ml [18]. The real-



163 time PCR was performed on the 7500 Fast Real-Time PCR System (Applied Biosystems,  
164 ThermoFisher). All the women who had malaria during pregnancy were treated with antimalarial  
165 drugs under medical prescription, according to the Brazilian Ministry of Health (MoH) guidelines,  
166 with further treatment confirmation.

#### 167   ▪ **Histopathology evaluation**

168 The histopathologic examination involved using placental tissue slides. The Hematoxylin-Eosin-  
169 staining allowed evaluating the syncytial nuclear aggregates (SNA), fibrinoid necrosis, and fibrin  
170 deposition [19]. The hemozoin presence was assessed through microscopy of polarized light [20].  
171 The leukocyte (CD45) and monocyte inflammatory infiltrate (CD68), and the villous vascularity  
172 (CD31) have been evaluated by immunohistochemistry using the tissue microarray (TMA)  
173 technique, conducted at the AC Camargo Hospital, in São Paulo, Brazil, as described elsewhere  
174 [21,22]. The proliferation index was calculated through quantitative image analysis of anti-Ki-  
175 67/DAB staining [23]. Supplementary Table S9 describes these procedures in detail. The images of  
176 placenta were captured by a Zeiss Axio Imager M2 light microscope equipped with a Zeiss Axio  
177 Cam HRC camera and analyzed by Image J software (<http://imagej.nih.gov/ij>).

#### 178   ▪ **Angiogenic factors and Leptin measurement**

179 The angiogenic factors, vascular endothelial growth factor A (VEGFA, and its receptors  
180 VEGFR1/FLT1 and VEGFR2/FLK1), angiopoietins 1 and 2 (ANG-1 and ANG-2, and their  
181 associated soluble receptor the TEK receptor tyrosine kinase (TIE-2)), and the leptin hormone were  
182 measured in placental plasma (1:20 dilution for all factors) using the DuoSet ELISA development  
183 kits (R&D), according to manufacturer's guidelines.

#### 184   ▪ **Screening of other infectious agents**

185 All pregnant women were screened in the local ANC clinics for toxoplasmosis, hepatitis, syphilis,  
186 and HIV by measuring antibodies titers, following the Brazilian MoH guidelines. Further,  
187 peripheral plasma from women that delivered babies with small head and microcephaly,  
188 irrespective of the infection status and *Plasmodium* species, was tested to confirm the absence of

189 other infectious agents during pregnancy. Tests for *Toxoplasma gondii*, Rubella, Cytomegalovirus,  
190 Herpes simplex virus, Syphilis, HIV, Dengue virus, Chikungunya virus, and Zika virus were  
191 performed retrospectively by ELISA assays in peripheral blood collected until the 28 weeks of  
192 gestation. In pregnant women that delivered babies with microcephaly, plasma samples of two  
193 different time points of the pregnancy were tested. All the serological tests were performed using  
194 commercially available kits: HIV 1/2 and total Syphilis (Symbiosys) and IgG/IgM to  
195 Toxoplasmosis, Rubella, Cytomegalovirus and Herpes simplex (TORCH) (Virion\Serion), and used  
196 according to the manufacturer's instructions. To detect Dengue, Chikungunya, and Zika current  
197 viral infections, qualitative assays were carried out by IgM capture using a specific viral antigen for  
198 DENV, ZIKV, and CHIKV, as previously described [24]. The identification of specific IgG  
199 antibodies to CHIKV was performed using a specific viral antigen [24], and to DENV and ZIKV  
200 were made with an antigen derived from a whole DENV-2 NS1 protein and a portion of the NS1  
201 protein, respectively (unpublished data). Developing color was quantified on an automatic  
202 microliter plate reader Spectramax Plus 384 (Molecular Devices). The results were expressed as  
203 optical density (OD) at 405/630 nm or 450/630 nm (Virion/Serion and Symbiosys/Alka Kits,  
204 respectively). In TORCH analyses, the presence of IgG and IgM antibodies were classified as  
205 positive, negative or borderline according to an OD range adopted by standard positive control  
206 mean. For Rubella and *Toxoplasma gondii* (IgG) avidity test was performed according to the  
207 manufacturer's specifications (Virion/Serion), and in all TORCH IgM tests, we use the rheumatoid  
208 factor absorbent reagent (# Z200, Virion/Serion). All the kits followed the validation criteria, and  
209 the presence of IgG and IgM antibodies for Syphilis and HIV antigens were determined by  
210 comparing the absorbance value of serum samples with the cut-off value of standards of reference  
211 controls and classified as positive or negative. All tests were performed without the operator  
212 knowledge of the group classification for each sample. If the test was inconclusive the screen was  
213 repeated using samples from two different gestational time-points. Newborns were excluded from  
214 the analysis whenever their mothers presented antibody titers for IgM.

215 **▪ Measurement of cytokines/anaphylatoxins by bead array**

216 The levels of the cytokines IL-12p70, TNF, IL-10, IL-6, IL-1b, and IL-8 in the placental plasma,  
217 were detected and quantified by a CBA human inflammatory kit (BD Biosciences) that was used  
218 according to the manufacturer's protocol. For complement activation studies (measuring C3a, C4a,  
219 and C5a) the CBA human anaphylatoxin kit (BD Biosciences) was used. The samples were  
220 analyzed in a two-laser BD FACSCalibur flow cytometer with CellQuest version 5.2 software (BD  
221 Biosciences), and concentrations computed using FCAP array software version 3.0.1 (BD  
222 Biosciences). All plasma samples were processed and kept at -80°C in Cruzeiro do Sul until they  
223 were sent to the University of São Paulo.

224

225 **Retrospective cohort study (RCS)**

226 **▪ Design, participants and data collection**

227 A total of 4697 maternal-child pairs were selected retrospectively through a population-based  
228 sampling of all deliveries occurring between January 2012 and December 2013. The data from the  
229 Brazilian Epidemiological Surveillance Information System (SIVEP)-Malaria of the mother malaria  
230 infection status during pregnancy was assembled with the clinical and anthropometric data present  
231 in the medical records of the mother and the newborn. This was followed by the collection and  
232 collation of the data to evaluate the newborns further.

233 **▪ Gestational age estimation**

234 The gestational age in the RCS was established mainly by the woman's last menstrual period  
235 (LMP). These data were obtained from the medical records. The LMP method is recommended by  
236 the Brazilian MoH for gestational age calculation when it is not possible to use ultrasound.

237 **▪ Newborns classification according to head circumference**

238 Based on the gestational age estimation methodologies, and on the HC size and gender, each  
239 newborn from RCS was assigned into groups using the WHO child growth standards (WHO-CGS)  
240 [25]. Gestational age assessment is considered accurate when acquired through ultrasound

241 performed early in the first trimester, but the date of the last menstrual period is considered  
242 unreliable [26]. According to WHO guidelines, the WHO-CGS provides an appropriate reference  
243 standard for term neonates when gestational age is not reliably known. An individual was in a  
244 normal head circumference (NHC) range if their HC was within one SD of the median, (boys  $33.2 \geq$   
245  $HC \leq 35.7$ , girls  $32.7 \geq HC \leq 35.1$ ). Newborns with HC below one SD below the median were  
246 considered to have a small head (SH) (boys  $HC < 33.2$ , girls  $HC < 32.7$ ) [17]. Newborns with HC  
247 below two SD below the median were classified as having microcephaly (MC) (boys  $HC < 31.9$ ,  
248 girls  $HC < 31.5$ ) [12].

#### 249 **▪ Screening of malaria infection**

250 Malaria during pregnancy was diagnosed from thin and thick blood smears by microscopists of the  
251 endemic surveillance team of Cruzeiro do Sul (Acre, Brazil), whenever women show suspicious  
252 malaria symptoms. These data were obtained from the Brazilian Epidemiological Surveillance  
253 Information System (SIVEP)-Malaria. All the women who had malaria during pregnancy were  
254 treated with antimalarial drugs under medical prescription, according to the Brazilian MoH  
255 guidelines.

#### 256 **▪ Screening of other infectious agents**

257 All pregnant women were screened in the local ANC clinics for toxoplasmosis, hepatitis, syphilis,  
258 and HIV by measuring antibodies titers, following the Brazilian MoH guidelines.

259

#### 260 **Newborn anthropometric measures**

261 In the two cohort studies, PCS and RCS, the newborn anthropometric measures were obtained  
262 immediately after the delivery, maximum within 24h, by trained nurses. Weight was measured in  
263 grams (g) using digital pediatric scales, with a precision of 5 g, and the length and occipitofrontal  
264 head circumference (HC) were measured in centimeters (cm), using a non-stretching flexible  
265 measuring tape. Rohrer's ponderal index is the newborns' weight in grams divided by the cube of  
266 the length in centimeters, and babies are considered proportional when values are above 2.5,

267 corresponding to the 10<sup>th</sup> percentile [27]. An Apgar score indicates the physical condition of the  
268 newborn, relative to its response to stimulation, skin coloration, heart rate, respiratory effort, and  
269 muscle tone. If the Apgar Score is between 7 and 10 the newborn is considered normal; if it is  
270 between 4 and 6 it is indicative that some assistance for breathing might be required; and below 4,  
271 the baby needs several interventions [28].

272

### 273 **Exclusion criteria**

274 Our analysis was restricted to babies that had been born at term (37 - 42 weeks of gestation) with at  
275 least 2500 grams of weight in a single birth and from mothers of fertile age (13 - 47 years old).  
276 Women were excluded if they had a history during pregnancy of smoking, drug use and/or alcohol  
277 consumption, and who presented with infections (TORCH, HIV, Hepatitis B virus, Hepatitis C  
278 virus, Syphilis, Dengue, Chikungunya and Zika virus), and/or other comorbidities (e.g.  
279 hypertension, pre-eclampsia/eclampsia, diabetes mellitus, preterm delivery, stillbirth, and newborn  
280 with congenital malformation). Due to the extremely high percentage of C-sections performed in  
281 Brazilian maternity units, women who underwent a C-section were not excluded from the study.

282

### 283 **Statistical analyses**

284 Data were analyzed using R (r-project.org), Stata (StataCorp), Minitab 18 and GraphPad Prism  
285 software. Continuous variables were summarized using means and SD, medians, and interquartile  
286 ranges (IQR). Categorical variables were summarized using frequencies and percentages.  
287 Differences between groups were evaluated using Mann-Whitney U-tests accordingly. Categorical  
288 data and proportions were analyzed using chi-square tests. All *p*-Values were 2-sided, at a  
289 significance level of 0.05. To assess the association between malaria and microcephaly, adjusted  
290 odds ratios (OR) with 95% confidence intervals (CI) were estimated using a multivariate logistic  
291 regression approach. These models included infection by malaria (no/yes), maternal age ( $\geq 18$  years  
292 old /  $\leq 17$  years old) and the number of gestations (two or more/one) as explanatory variables and

293 SH (yes/no) or microcephaly (yes/no) as response variables. The first category for each explanatory  
294 variable was considered as reference [29]. Missing data were imputed or “filled in” within a  
295 multiple imputation framework using the “MICE” library within the R software [30,31]. In  
296 particular, 5 datasets were completed and the results pooled across allowing for the uncertainty in  
297 the imputation process.

298 The current sample sizes present a deviation from those proposed at the outset. It was proposed to  
299 enroll ~400 infected and ~800 non-infected pregnant women into the prospective cohort study. We  
300 were unable to recruit to this 2:1 ratio, as some initially included in the non-infected group, were  
301 transferred to an infected group upon *Plasmodium* molecular detection.

302 The manuscript was written according to the STROBE statement guidelines.

303

## 304 RESULTS

### 305 Study Population

306 A total of 600 pregnant women were enrolled in a prospective cohort study (PCS) and followed  
307 until delivery. Of the first eligible maternal-child pairs, 409 (68.2%) met the inclusion criteria (Fig.  
308 2). Among the 409 newborns, 251 were born from mothers that had malaria infection during  
309 pregnancy, *P. vivax* (*Pv*), *P. falciparum* (*Pf*) or both (mixed) (Fig. 2). Overall, there were no  
310 relevant maternal and newborns baseline differences between the distinct groups (Supplementary  
311 Tables S1 and S2). Nonetheless, women that were *Plasmodium*-infected presented few  
312 characteristics at delivery that were slightly different from the Non-Infected group: less weight gain,  
313 lower hematocrit, lower hemoglobin, and reduced placental weight (Supplementary Tables S1).

314

### 315 Reduced head circumference in newborns from women infected with *P. falciparum* during 316 pregnancy

317 The frequency distribution of the newborns HC born from non- (NI) and malaria-infected mothers  
318 (Malaria), including LBW and preterm babies, evidenced differences between the two groups. The  
319 Malaria group displayed a deviated peak and spread to the left when compared with the NI group,  
320 indicative of more newborns with reduced HC ( $p = 0.005$ ) (Fig. 3a). Nevertheless, to assure that the  
321 observed difference was not due to the LBW and preterm babies, these newborns were removed  
322 from the analysis and segregated the malaria-infected group into *Plasmodium* species infected  
323 groups. Even though, it was possible to observe an apparent deviation of the peak of the *P.*  
324 *falciparum*-infected group (*Pf*) from the non-infected (NI) ( $p = 0.023$ ) (Fig. 3b), indicating a higher  
325 frequency of babies with smaller HC when mothers are infected by *P. falciparum*.

326 Among the evaluated newborns in the PCS, 70 (17.1%) babies presented with a small head (SH),  
327 including 15 (3.7%) with microcephaly (Fig. 3c). The evaluated babies were considered  
328 proportionate through the Rohrer Index, independently of the HC size (Supplementary Table S3).

329 Further, to evaluate the association of malaria during pregnancy with fetus head growth, the

330 newborns were segregated by HC and the mother infection status: non-infected, *P. vivax*-, mixed- or  
331 *P. falciparum*-infected. The prevalence of newborns with SH was higher among babies born from  
332 women infected with *P. falciparum* (30.7%) during pregnancy. Similarly, the prevalence of  
333 microcephaly doubled when a *P. falciparum* infection has occurred (8.1%) (Fig. 3c). In fact, a  
334 multivariate logistic regression analysis identified *P. falciparum* infection as increasing the odds of  
335 occurring SH in newborns (OR 3.15, 95% CI 1.52-6.53,  $p = 0.002$ ) (Fig. 3c). Likewise, it revealed a  
336 higher likelihood of occurring microcephaly in babies born from mothers that were *P. falciparum*-  
337 infected (OR 5.09, 95% CI 1.12-23.17,  $p = 0.035$ ) (Fig. 3c). Strikingly, *P. vivax* infection during  
338 pregnancy was not found to be associated with reduced HC (for SH, OR 1.30, 95% CI 0.66-2.59,  $p$   
339  $= 0.449$ ). Maternal-child pairs that presented misleading factors such as TORCH infections,  
340 Syphilis, HIV, Dengue, Chikungunya, and Zika virus, and alcoholism and drug use declared in the  
341 medical records, or identified in all mothers that delivered babies with were discarded SH  
342 (Supplementary Tables S4 and S5).

343

#### 344 **Reduced head circumference in newborns is associated with placental malaria**

345 Further, several placental parameters were evaluated to ascertain the relation of placental malaria  
346 due to *P. falciparum* infection with the SH occurrence. Strikingly, babies with SH (*Pf*-SH) born  
347 from mothers that had their first infection later in gestation (median [IQR], 25.5 weeks [18.0-32.5],  
348  $p = 0.014$ ) when compared with NHC (19.0 weeks [12.0-29.3]). Moreover, much of the placental  
349 malaria manifestation in newborns with SH (*Pf*-SH) or microcephaly (*Pf*-MC) was due to a past *P.*  
350 *falciparum* infection (54% and 72%, respectively), as opposed to 48% in placentas from newborns  
351 with NHC (*Pf*-NHC) (Table 1).

352 The analysis of placental histology parameters and angiogenic factors disclosed substantial  
353 differences between non-infected controls and *P. falciparum*-infected groups. Of note, in all *P.*  
354 *falciparum*-infected groups, we observed higher monocytes infiltrate (median[IQR], *Pf*-NHC 7.0  
355 [5.0-13.0],  $p < 0.0001$ ; *Pf*-SH 9.5 [5.5-15.0],  $p < 0.0001$ ; *Pf*-MC 9.0 [6.0-11.0],  $p = 0.018$  vs Non-



356 Infected 4.0 [2.0-7.0]) (Fig. 4c, d). On the other hand, the syncytial nuclear aggregates (SNA) and  
357 Leptin alterations were only observed in infected placentas of babies with SH and MC. Remarkably,  
358 SNA that have a long-standing association with placental pathologies [32], presented excessive  
359 formation in the *Pf*-SH and *Pf*-MC groups (17.5 [12.0-24.5],  $p = 0.002$  and 18.0 [12.0-30.0],  $p =$   
360 0.023, respectively) when compared to the Non-Infected (13.0 [10.0-17.0]) (Fig. 4g, h), as well,  
361 when *Pf*-SH was compared to *Pf*-NHC. Moreover, the Leptin levels were markedly reduced in the  
362 *Pf*-SH and *Pf*-MC groups (19.5 [4.5-37.2],  $p = 0.013$  and 16.7 [9.0-26.7],  $p = 0.027$ , respectively)  
363 when compared to the Non-Infected (33.1 [17.2-47.4]) (Fig. 5i). Complete data details can be found  
364 in Supplementary Table S6.

365 Furthermore, evaluation of inflammatory factors in the placental plasma revealed differences  
366 mainly between the Non-Infected group and the *Pf*-NHC group. Though, the *Pf*-SH group shows  
367 statistically significant higher IL8 and smaller C3a plasma levels (45.1 [22.1-85.9],  $p = 0.044$ ; and,  
368 3.0 [0-5.5],  $p = 0.014$ , respectively) when compared to the Non-Infected group (25.5 [15.7-52.2],  
369 and, 4.5 [3.2-6.6], respectively) (Supplementary Table S7). These results support a placental  
370 dysfunction upon *P. falciparum* infection, which in some parameters are specifically heightened in  
371 placentas derived from babies with reduced HC, like the syncytial nuclear aggregates.

372

### 373 **Retrospective cohort study corroborates the reduced head circumference association with *P.*** 374 ***falciparum* infection**

375 Further, a population-based retrospective cohort study (RCS) was conducted to confirm the  
376 association results. A total of 4697 maternal-child pairs were included, and upon application of the  
377 exclusion criteria, 3882 (83%) newborns remained to be evaluated, of which, 232 were born from  
378 mothers that had malaria infection during pregnancy (Fig. 2). Overall, there were no significant  
379 differences in baseline characteristics between the PCS and the RCS (Supplementary Tables S1, S2,  
380 and S8). The evaluation of the frequency distribution of the newborns HC born from non- (NI) and  
381 malaria-infected mothers (Malaria), showed differences between the two groups ( $p = 0.008$ ) (Fig.

382 6a). Identical to the PCS, when the LBW and preterm babies were removed from the analysis, and  
383 the malaria-infected group segregated, the *P. falciparum*-infected group (*Pf*) presented a deviated  
384 peak from the non-infected (NI) ( $p = 0.015$ ) (Fig. 6b). Indicative of a higher frequency of newborns  
385 with reduced HC when mothers are infected with *P. falciparum* during pregnancy.  
386 The evaluated newborns included 934 (24.1%) babies with SH and 161 (4.2%) with microcephaly.  
387 In the RCS, similarly to the PCS, the prevalence of newborns with SH was more than one-half  
388 higher (36.6%) among babies born from *P. falciparum*-infected mothers, and the microcephaly  
389 prevalence almost doubled in the presence of a *P. falciparum* infection (7.3%) (Fig. 6c).  
390 Analogously, the multivariate logistic regression analysis revealed that *P. falciparum* infection  
391 increases the odds of occurring SH in newborns (Odds ratio [OR] 1.91, 95% CI 1.21-3.04,  $p =$   
392 0.006) (Fig. 6c). Altogether, these results demonstrate that *P. falciparum* infection during  
393 pregnancy increases the likelihood of occurring reduced HC in the newborns, corroborating the  
394 results obtained in the PCS.

## 395 **DISCUSSION**

396 It is well-established that malaria during pregnancy increases the risk of adverse fetal outcomes,  
397 such as abortion, IUGR, premature births and LBW. We show for the first-time evidence that *P.*  
398 *falciparum* infection during pregnancy is significantly associated with the occurrence of reduced  
399 HC in the newborns, and to some extent, with microcephaly. The revealed newborn HC reduction is  
400 independent of the already known impact that malaria has on the whole fetal growth, as LBW and  
401 preterm newborns were deliberately excluded from our analysis.

402 The increased risk for developing reduced HC associated with *P. falciparum* infection was  
403 supported by a prospective study (PCS) (Odds Ratio (OR) 3.15,  $p = 0.002$ ) and subsequently  
404 corroborated by a retrospective study (RCS) (OR 1.91,  $p = 0.006$ ). Remarkably, in the prospective  
405 study, the OR doubles when we consider only the microcephaly cases (OR 5.09,  $p = 0.035$ ). These  
406 observations reinforce the knowledge that malaria during pregnancy increases the risk of problems  
407 in fetal development [3–5].

408 We hypothesize that the placental inflammatory process acting upon *P. falciparum* infection is  
409 contributing to impair the fetal head growth. This hypothesis is supported by the observation of  
410 histopathological alterations, combined with an imbalance in angiogenic factors production and  
411 inflammatory factors in placentas from babies with congenital SH or microcephaly when mothers  
412 were *P. falciparum*-infected. A local inflammation can generate a frame of hypoxia/ischemia that  
413 would alter the transportation of both nutrients and respiratory gases to the unborn baby, which can  
414 impact on cranial malformation due to the lack of an adequate supply of nutrients and oxygen [33].  
415 Also, the oxidative stress caused by hypoxia leads to several structural and functional alterations in  
416 the intrauterine development [34]. This scenario is often observed in cases of placental malfunction  
417 due to different etiologies, and prolonged and premature labor [35].

418 Interestingly, the values of SNA or syncytial knotting, which has been associated with IUGR due to  
419 local hypoxia/oxidative stress [32], were highly increased in placentas from the *Pf*-SH and *Pf*-MC  
420 groups when compared to the other control groups. Syncytial knotting has repeatedly been observed

421 in placentas from *P. falciparum*-exposed women [4,19,36]. In fact, the major placental alterations  
422 observed, including syncytial knots and monocytes inflammatory infiltrate, are consistent with  
423 previous reports on placental inflammatory responses due to sequestration of *P. falciparum*  
424 parasites in the placenta, which characterizes the placental malaria development [4,5,19]. The  
425 evaluation of cytokine levels and complement in our samples did not show an overall alteration.  
426 Nevertheless, these only reflect a picture at the moment of birth. It is unsurprising that *P. vivax*  
427 infection was not associated with the head reduction phenotype, as this parasite is known as not  
428 sequestering in the placenta. Previous studies have demonstrated that *P. vivax* infection during  
429 pregnancy induces a less placental inflammatory process when compared with *P. falciparum*  
430 infection [19].

431 The presence of residual tissue lesions and impaired leptin production constitute clear evidence of  
432 damage. In fact, the *Pf*-SH and *Pf*-MC groups presented deregulated leptin levels. The impaired  
433 production of leptin, a hormone commonly produced in substantial amounts by the placenta, can be  
434 related to placental inflammation upon infection. Also, leptin has been shown associated with fetal  
435 growth restriction [37]. Regarding the *Pf*-SH group, few observed differences reached statistical  
436 significance, possibly due to the small sample size of this group, but the overall placental malaria  
437 phenotype is more prominent and widespread than in non-infected and *Pf*-NHC groups.

438 Nevertheless, it is unclear how placental alterations due to inflammation impact on the development  
439 of the fetus.

440 Currently, much of what is known about falciparum gestational malaria is based on studies  
441 performed in African high transmission areas, which in general are settings that have precarious  
442 health systems and inadequate or late treatment provision. In Brazil, approximately 85% of the  
443 infections are caused by *P. vivax*. *P. falciparum* is only transmitted in specific regions, including in  
444 the one evaluated in this work (“Alto do Juruá” valley, Acre), where it is responsible for 46% of the  
445 total infections in Brazil [13,14]. Interestingly, despite Brazil being a low transmission area for

446 malaria with effective control strategies and early treatment provision, we observed adverse events  
447 in newborns similar to those reported in areas of high endemicity.

448 Surprisingly, the prevalence of microcephaly ( $HC < -2 SD$ ) observed by us is far higher than what  
449 has been previously reported by the Brazilian Ministry of Health [12]. Two independent studies  
450 have recently evaluated retrospectively babies born in two different Brazilian regions, and also  
451 reported a higher prevalence of microcephaly in babies born before the Zika outbreak [38,39]. In  
452 one, 16,208 infants born between 2012 and 2015 in the Paraiba State (Brazil) were evaluated, and  
453 4.2 to 8.2% of microcephaly prevalence was reported, depending on the classification criteria [38].  
454 In the other, 8,275 babies born between 2011 and 2015 in the southeastern and mid-western  
455 Brazilian region were evaluated, and an overall prevalence of microcephaly of 5.6% was identified  
456 [39]. In fact, it is puzzling that a country like the USA with about 3.5 millions of births per year  
457 reports annually approximately 25,000 infants with microcephaly [40]; on the other hand, Brazil  
458 with about 3 million births per year reported around 150 microcephaly cases annually, before Zika  
459 epidemic [41]. These observations indicate an inconsistency of the data released by the Brazilian  
460 authorities probably due to under-reporting.

461 Our work has some potential limitations. First, the babies' HC was only assessed at birth, since it  
462 was not possible to perform the morphometric measures through ultrasonography during pregnancy  
463 in the public health system, as well as the possibility of acquiring newborn head imaging. Second,  
464 reduction of HC has different etiologies, namely, genetic causes and action of infectious agents.  
465 While we have discarded misleading factors, such as TORCH infections, Syphilis, HIV, Dengue,  
466 Chikungunya and Zika virus, as well as smoking, alcoholism and drug use, studies to detect genetic  
467 abnormalities in those patients were not performed. Third, although in both the PCS and the RCS  
468 the logistic-regression analysis indicates a strong association between SH and *P. falciparum*  
469 infection, we only had access to few placentas. The smaller sample size has limited the statistical  
470 analysis; however, most of the parameters analyzed indicated intensified placental malaria when  
471 compared to placentas from newborns with normal head size.

472 **CONCLUSION**

473 This work provides evidence that *P. falciparum* infection during pregnancy can impact the head  
474 growth of the fetus, which leads to small heads and in extreme cases to microcephaly. If our results  
475 are confirmed, the consequences of gestational malaria over fetal neurological development, which  
476 can lead to poor neurocognitive and behavioral development, represents a serious long-term health  
477 problem. Physicians should periodically assess the development and academic achievements of  
478 these children, with a comprehensive neurocognitive evaluation, to guide preventive and  
479 rehabilitative assistance that might improve outcomes. Extensive epidemiological prospective  
480 studies, involving the collection of biological, clinical, and socioeconomic data and potential  
481 confounding factors, are required to establish the prevalence of SH and microcephaly and its  
482 association with malaria. Our work reinforces the urgent need to protect the pregnant women and  
483 their unborn babies from the devastating effects of malaria infection.

484

## 485 **ABBREVIATIONS**

486 **ANC:** Antenatal care; **ANG-1 and ANG-2:** Angiopoietins 1 and 2; **CI:** Confidence intervals; **cm:**  
487 centimeters; **g:** Grams; **HC:** head circumference; **H&E:** Hematoxylin-Eosin; **HMCJ:** Hospital da  
488 Mulher e da Criança do Juruá; **IUGR:** Intrauterine growth retardation; **IQR:** Interquartile ranges;  
489 **LBW:** Low birth weight; **LMP:** Last menstrual period; **MC:** Microcephaly; **MoH:** Ministry of  
490 Health; **NHC:** Normal head circumference; **NI:** Non-infected; **OD:** Optical density; **OR:** Odds  
491 ratio; **PCS:** Prospective cohort study; **Pf:** *Plasmodium falciparum*; **Pv:** *Plasmodium vivax*; **RCS:**  
492 Retrospective cohort study; **SD:** standard deviations; **SH:** Small head; **SIVEP:** Epidemiological  
493 Surveillance Information System; **SNA:** Syncytial nuclear aggregates; **TIE-2:** TEK receptor  
494 tyrosine kinase; **TMA:** Tissue microarray; **TORCH:** abbreviation for Toxoplasma, rubella,  
495 cytomegalovirus, and Herpes simplex; **VEGFA:** Vascular endothelial growth factor A; **WHO:**  
496 World Health Organization; **WHO-CGS:** WHO child growth standards.

497

## 498 **DECLARATIONS**

### 499 **Ethics approval and consent to participate**

500 Ethical clearance was provided by the committees for research of the University of São Paulo and  
501 the Federal University of Acre (Plataforma Brasil, CAAE: 03930812.8.0000.5467 and  
502 03930812.8.3001.5010, respectively), according to Resolution nº 196/96 of Brazilian National  
503 Health Committee. All the study participants or their legal guardians (if minors) gave written  
504 informed consent. The authors have agreed to maintain the confidentiality of the data collected from  
505 the medical records and databases, by signing the Term of Commitment for the Use of Data from  
506 Medical Records. The study was conducted in accordance with the Declaration of Helsinki and is  
507 registered in the Brazilian Clinical Trials Registry as RBR-3yrqfq.

508

### 509 **Consent for publication**

510 Not applicable.

511

512 **Availability of data and materials**

513 All relevant data are available from the authors on request.

514

515 **Competing interests**

516 The authors declare that they have no competing interests.

517

518 **Funding**

519 This work was primarily funded by grants from São Paulo Research Foundation (FAPESP), CRFM  
520 (2009/53889-0 and 2014/09964-5) and SE (2014/20451-0). JMS was supported by CNPq  
521 (308613/2011-2) and FAPESP (2013/21728-2). PMAZ was supported by FAPESP (2014/17766-9).  
522 MAGG was supported by CNPq (404478/2012-3). TGC was supported by the Medical Research  
523 Council UK (Grant no. MR/K000551/1, MR/M01360X/1, MR/N010469/1, MC\_PC\_15103). SC  
524 was funded by the Medical Research Council UK (Grant no. MR/M01360X/1, MC\_PC\_15103).  
525 JGD, FAL, OM, MPC, and LAG were supported by FAPESP fellowships (2012/04755-3,  
526 2013/16417-8, 2013/00981-1, 2016/08204-2, and 2015/06106-0, respectively). The funders had no  
527 role in analysis design, data collection and analysis, decision to publish, or preparation of the  
528 manuscript.

529

530 **Authors' contributions**

531 JGD, RMS, SE, and CRFM designed the study. JGD, RMS, FAL, CLB, OM, DSC, EPMP, MPC,  
532 PMAZ, MAGG, SE, LAG, and CRFM were involved in data acquisition and scientific input. JGD,  
533 RMS, FAL, CLB, OM, DSC, EPMP, MPC, PMAZ, EB, MAGG, SC, TGC, SE, LAG, and CRFM  
534 contributed to the analysis and/or interpretation of data. ACPL, JMS, and TGC performed the  
535 multivariate logistic regression analysis. LAG and CRFM wrote the manuscript and compiled the  
536 information in the Supplementary information. CRFM and SE were the main funders of this work.



537 CRFM have had full access to all the data in the study and takes responsibility for the integrity of  
538 the data and the accuracy of the data analysis. All authors reviewed and approved the final version  
539 of this manuscript.

540

#### 541 **Acknowledgements**

542 We thank the women from “Alto do Juruá” valley who agreed to participate in the study, as well as  
543 the nurses and technicians from the Hospital da Mulher e da Criança do Juruá and Gerência de  
544 Endemias/SESACRE team for their invaluable assistance. Also, we thank the direction of Santa  
545 Casa de Misericórdia de Cruzeiro do Sul, and Universidade Federal do Acre for the support.  
546 Additionally, we thank Alexandre Macedo de Oliveira from Centers for Disease Control and  
547 Prevention (CDC) for his ongoing support of our study; Ricardo Ataíde for assistance during  
548 fieldwork and scientific input; and Bernardo Paulo Albe for technical assistance. Finally, we thank  
549 Venkatachalam Udhayakumar, Luciana Flannery and Naomi Lucchi from Malaria Laboratory  
550 Research and Development Unit at CDC for all the support on the establishment and training of the  
551 PET-PCR technique, which was funded by the U.S. Agency for International Development  
552 (USAID) through the Amazon Malaria Initiative (AMI).

553

554 **REFERENCES**

- 555 1. World Health Organization. World Malaria Report 2015. 2015.
- 556 2. Dellicour S, Tatem AJ, Guerra CA, Snow RW, Ter Kuile FO. Quantifying the number of  
557 pregnancies at risk of malaria in 2007: A demographic study. *PLoS Med.* 2010;7:1–10.
- 558 3. Desai M, ter Kuile FO, Nosten F, McGready R, Asamo K, Brabin B, et al. Epidemiology and  
559 burden of malaria in pregnancy. *Lancet Infect. Dis.* 2007;7:93–104.
- 560 4. Ismail MR, Ordi J, Menendez C, Ventura PJ, Aponte JJ, Kahigwa E, et al. Placental pathology in  
561 malaria: a histological, immunohistochemical, and quantitative study. *Hum. Pathol.* 2000;31:85–93.
- 562 5. Rogerson SJ, Hviid L, Duffy PE, Leke RFG, Taylor DW. Malaria in pregnancy: pathogenesis  
563 and immunity. *Lancet Infect. Dis.* 2007;7:105–17.
- 564 6. Guyatt HL, Snow RW. Malaria in pregnancy as an indirect cause of infant mortality in sub-  
565 Saharan Africa. *Trans. R. Soc. Trop. Med. Hyg.* 2001;95:569–76.
- 566 7. Menendez C, Ordi J, Ismail MR, Ventura PJ, Aponte JJ, Kahigwa E, et al. The Impact of  
567 Placental Malaria on Gestational Age and Birth Weight. *J. Infect. Dis.* 2000;181:1740–5.
- 568 8. Meuris S, Piko BB, Eerens P, Vanbellinghen AM, Dramaix M, Hennart P. Gestational malaria:  
569 assessment of its consequences on fetal growth. *Am J Trop Med Hyg.* 1993;48:603–9.
- 570 9. Zhao J, Chen Y, Xu Y, Pi G. Effect of intrauterine infection on brain development and injury. *Int.*  
571 *J. Dev. Neurosci.* International Society for Developmental Neuroscience; 2013;31:543–9.
- 572 10. Neu N, Duchon J, Zachariah P. TORCH Infections. *Clin. Perinatol.* Elsevier Inc; 2015;42:77–  
573 103.
- 574 11. Tetro JA. Zika and microcephaly: Causation, correlation, or coincidence? *Microbes Infect.*  
575 Elsevier Masson SAS; 2016;18:167–8.
- 576 12. Passemard S, Kaindl AM, Verloes A. Microcephaly. In: Dulac O, Llassonde M, Sarnat H,  
577 editors. *Handb. Clin. Neurol.* Vol. 111, *Pediatr. Neurol.* Part I. Elsevier B.V.; 2013. p. 129–41.
- 578 13. SIVEP - Secretaria de Vigilância em Saúde - Ministério da Saúde. Malária: monitoramento dos  
579 casos no Brasil em 2014. 2015.

- 580 14. Ferreira MU, Castro MC. Challenges for malaria elimination in Brazil. *Malar. J.* 2016;15:284.
- 581 15. Kohara Melchior LA, Chiaravalloti Neto F. Spatial and spatio-temporal analysis of malaria in  
582 the state of Acre, western Amazon, Brazil. *Geospat. Health.* 2016;11.
- 583 16. Villar J, Ismail LC, Victora CG, Ohuma EO, Bertino E, Altman DG, et al. International  
584 standards for newborn weight, length, and head circumference by gestational age and sex: the  
585 Newborn Cross-Sectional Study of the INTERGROWTH-21st Project. *Lancet.* 2014;384:857–68.
- 586 17. Brennan TL, Funk SG, Frothingham TE. Disproportionate intra-uterine head growth and  
587 developmental outcome. *Dev. Med. Child Neurol.* 1985;27:746–50.
- 588 18. Lucchi NW, Narayanan J, Karell MA, Xayavong M, Kariuki S, DaSilva AJ, et al. Molecular  
589 Diagnosis of Malaria by Photo-Induced Electron Transfer Fluorogenic Primers: PET-PCR. *PLoS*  
590 *One.* 2013;8:e56677.
- 591 19. Souza RM, Ataíde R, Dombrowski JG, Ippólito V, Aitken EH, Valle SN, et al. Placental  
592 Histopathological Changes Associated with Plasmodium vivax Infection during Pregnancy. *PLoS*  
593 *Negl. Trop. Dis.* 2013;7:e2071.
- 594 20. Romagosa C, Menendez C, Ismail MR, Quintó L, Ferrer B, Alonso PL, et al. Polarisation  
595 microscopy increases the sensitivity of hemozoin and Plasmodium detection in the histological  
596 assessment of placental malaria. *Acta Trop.* 2004;90:277–84.
- 597 21. Ataíde R, Murillo O, Dombrowski JG, Souza RM, Lima FA, Lima GFMC, et al. Malaria in  
598 Pregnancy Interacts with and Alters the Angiogenic Profiles of the Placenta. *PLoS Negl. Trop. Dis.*  
599 2015;9:e0003824.
- 600 22. Hsu SM, Raine L, Fanger H. A comparative study of the peroxidase-antiperoxidase method and  
601 an avidin-biotin complex method for studying polypeptide hormones with radioimmunoassay  
602 antibodies. *Am. J. Clin. Pathol.* 1981;75:734–8.
- 603 23. Tuominen VJ, Ruotoistenmaki S, Viitanen A, Jumppanen M, Isola J. ImmunoRatio: a publicly  
604 available web application for quantitative image analysis of estrogen receptor (ER), progesterone  
605 receptor (PR), and Ki-67. *Breast Cancer Res.* 2010;12:R56.

- 606 24. Sow A, Loucoubar C, Diallo D, Faye O, Ndiaye Y, Senghor CS, et al. Concurrent malaria and  
607 arbovirus infections in Kedougou, southeastern Senegal. *Malar. J. BioMed Central*; 2016;15:47.
- 608 25. WHO Multicentre Growth Reference Study Group. WHO Child Growth Standards: Head  
609 circumference-for-age, arm circumference-for-age, triceps skinfold-for-age and subscapular  
610 skinfold-for-age: Methods and development. Geneva: World Health Organization; 2007.
- 611 26. World Health Organization. Screening, assessment and management of neonates and infants  
612 with complications associated with Zika virus exposure in utero. WHO Press. 2016.
- 613 27. WHO Expert Committee on Physical Status. Physical status: the use and interpretation of  
614 anthropometry. Geneva: World Health Organization; 1995.
- 615 28. American Academy of Pediatrics Committee on Fetus and Newborn, American College of  
616 Obstetricians and Gynecologists Committee on Obstetric Practice. The Apgar Score. *Pediatrics*.  
617 2015;136:819.
- 618 29. Hosmer DW, Lemeshow S. *Applied Logistic Regression*. 2nd Ed. New York: Wiley; 2013.
- 619 30. Rubin DB. Multiple Imputation After 18+ Years. *J. Am. Stat. Assoc.* 1996;91:473–89.
- 620 31. Van Buuren S, Groothuis-Oudshoorn K. mice: Multivariate Imputation by Chained Equations in  
621 R. *J. Stat. Softw.* 2011;45:1–67.
- 622 32. Heazell AEP, Moll SJ, Jones CJP, Baker PN, Crocker IP. Formation of syncytial knots is  
623 increased by hyperoxia, hypoxia and reactive oxygen species. *Placenta*. 2007;28 Suppl A:S33-40.
- 624 33. Nelson KB, Penn AA. Is infection a factor in neonatal encephalopathy? *Arch. Dis. Child. - Fetal*  
625 *Neonatal Ed.* 2015;100:F8–10.
- 626 34. Kurinczuk JJ, White-Koning M, Badawi N. Epidemiology of neonatal encephalopathy and  
627 hypoxic-ischaemic encephalopathy. *Early Hum. Dev.* 2010;86:329–38.
- 628 35. Boksa P. Animal models of obstetric complications in relation to schizophrenia. *Brain Res. Rev.*  
629 2004;45:1–17.
- 630 36. Bulmer JN, Rasheed FN, Morrison L, Francis N, Greenwood BM. Placental malaria. II. A semi-  
631 quantitative investigation of the pathological features. *Histopathology*. 1993;22:219–26.

- 632 37. Conroy AL, Liles WC, Molyneux ME, Rogerson SJ, Kain KC. Performance characteristics of  
633 combinations of host biomarkers to identify women with occult placental malaria: A case-control  
634 study from Malawi. *PLoS One*. 2011;6.
- 635 38. Soares de Araújo JS, Regis CT, Gomes RGS, Tavares TR, Rocha dos Santos C, Assunção PM,  
636 et al. Microcephaly in north-east Brazil: A retrospective study on neonates born between 2012 and  
637 2015. *Bull. World Health Organ*. 2016;94:835–40.
- 638 39. Magalhães-Barbosa MC de, Prata-Barbosa A, Robaina JR, Raymundo CE, Lima-Setta F, Cunha  
639 AJLA da. Prevalence of microcephaly in eight south-eastern and midwestern Brazilian neonatal  
640 intensive care units: 2011–2015. *Arch. Dis. Child*. 2017;0:1–7.
- 641 40. Ashwal S, Michelson D, Plawner L, Dobyns WB. Practice parameter: evaluation of the child  
642 with microcephaly (an evidence-based review). *Neurology*. 2009;73:887–97.
- 643 41. Ministério da Saúde - Secretaria de Vigilância em Saúde -Brasil. Microcefalia: Ministério da  
644 Saúde divulga boletim epidemiológico [Internet]. Portal Saúde. 2015 [cited 2017 Mar 31].  
645 Available from: [http://portalsaude.saude.gov.br/index.php/cidadao/principal/agencia-saude/20805-](http://portalsaude.saude.gov.br/index.php/cidadao/principal/agencia-saude/20805-ministerio-da-saude-divulga-boletim-epidemiologico)  
646 [ministerio-da-saude-divulga-boletim-epidemiologico](http://portalsaude.saude.gov.br/index.php/cidadao/principal/agencia-saude/20805-ministerio-da-saude-divulga-boletim-epidemiologico)  
647

648 **FIGURES**

649 **Figure 1. Map showing the location of the field site, Alto do Juruá river region, Northwest of**  
650 **the Acre State, Brazilian Amazon.**

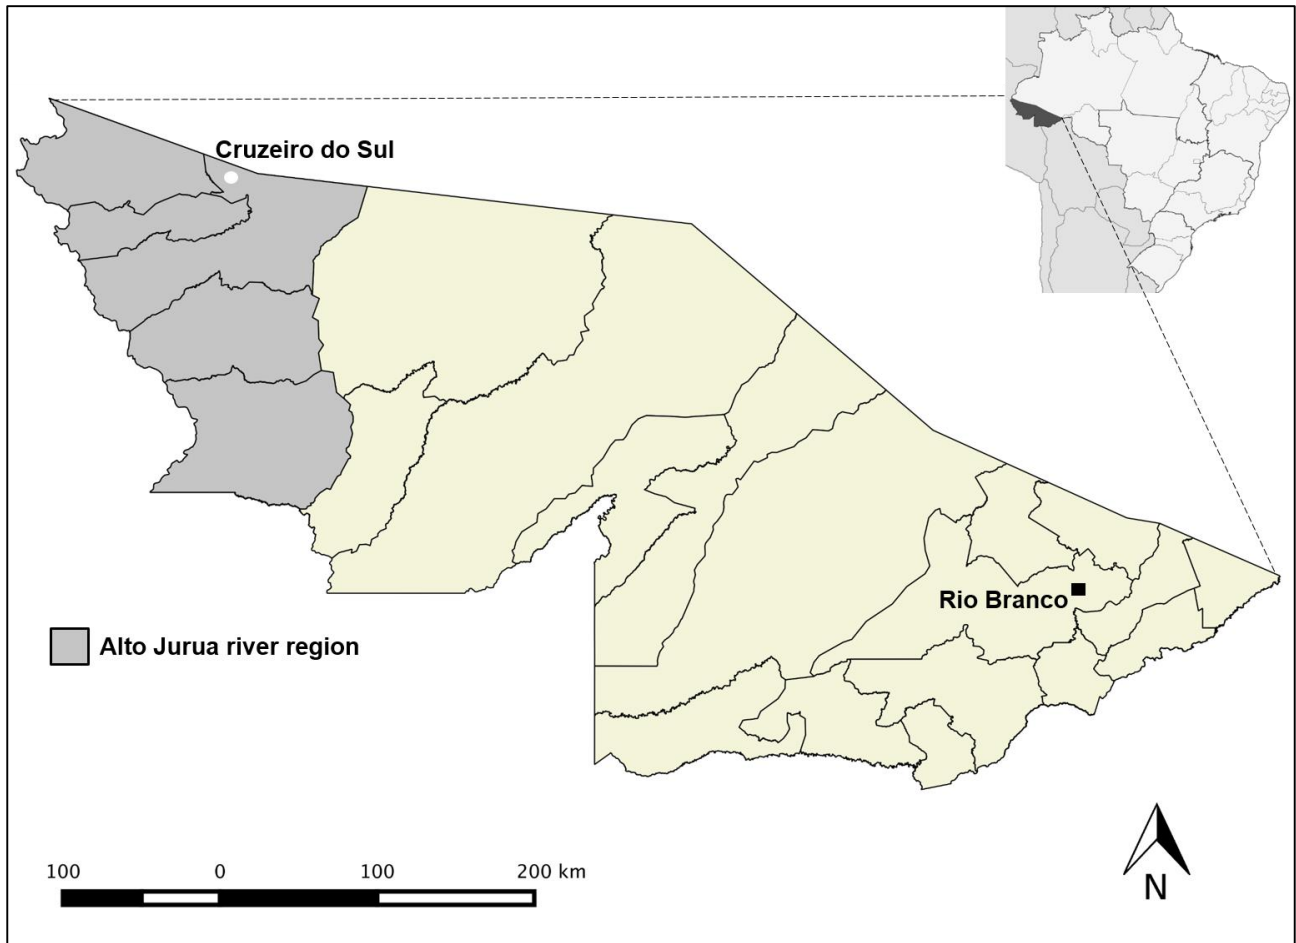

651

652 The map also indicates Cruzeiro do Sul where the field laboratory is situated, and Rio Branco, the  
653 capital of the state of Acre.

654

655

656

657

658

659

660

661

662

663 **Figure 2. Flow diagram of the two cohort studies detailing exclusion criteria.**

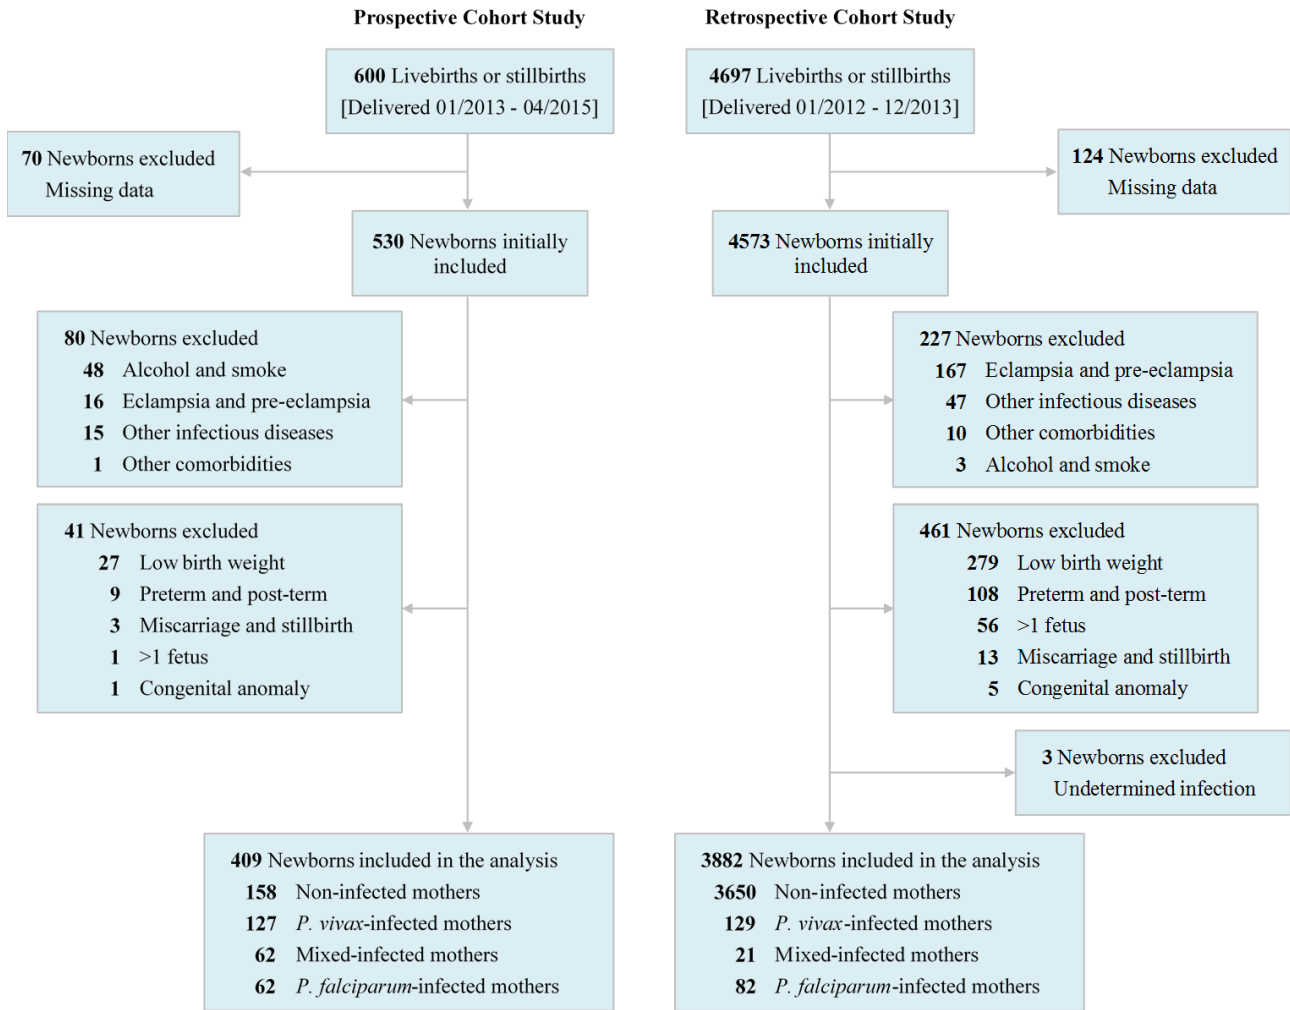

664

665 Mixed infection – *P. vivax*- and *P. falciparum*-infection occurring at the same time and/or at  
666 different times during pregnancy.

667

668

669

670

671

672

673

674

675

676 **Figure 3. Prospective cohort study shows that malaria infection during pregnancy impacts**  
 677 **babies head circumference.**

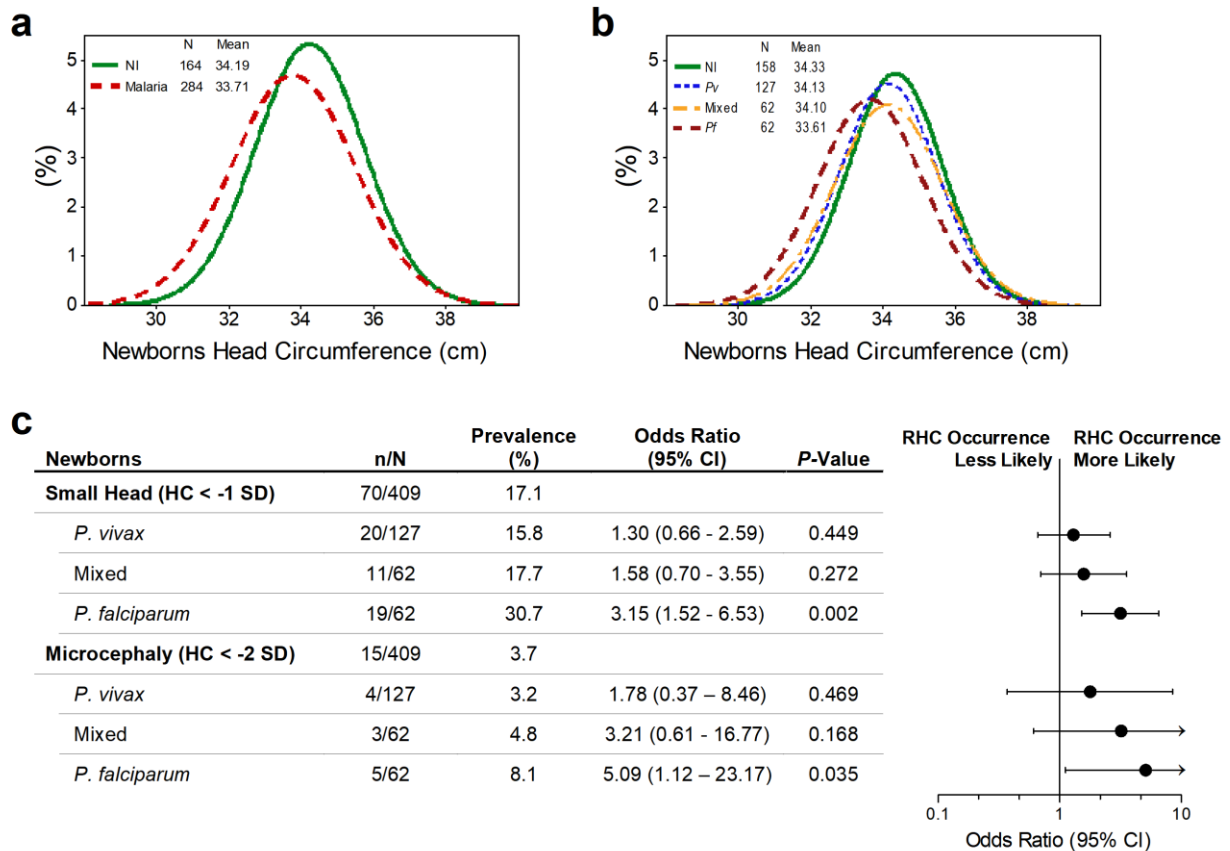

678  
 679 **a, b** Newborns head circumference frequency distribution in the PCS according to maternal  
 680 infection status: malaria- and non-infected (NI) mothers ( $p = 0.005$ ) (**a**), and NI, *Pv*, Mixed and *Pf*-  
 681 infected mothers after excluding LBW and preterm babies (NI vs *Pf*  $p = 0.023$ ) (**b**). The differences  
 682 in the frequency distributions between each group were examined with Mann-Whitney rank sum  
 683 tests. **c** Forest plot of the Odds Ratio of small head or microcephaly in babies born from women  
 684 infected during pregnancy compared to babies from non-infected women, according to *Plasmodium*  
 685 species. Mixed infection – *P. vivax*- and *P. falciparum*-infection occurring at the same time and/or  
 686 at different times during pregnancy. n/N - number of events by total number of individuals in each  
 687 group; CI - confidence interval; HC - head circumference; SD - standard deviation; *P*-Values were  
 688 estimated through multivariate logistic regression methods.

689

690

691



692 **Figure 4. Histopathological parameters evaluation of placentas from non- and *P. falciparum*-**  
693 **infected mothers according to newborns head circumference.**

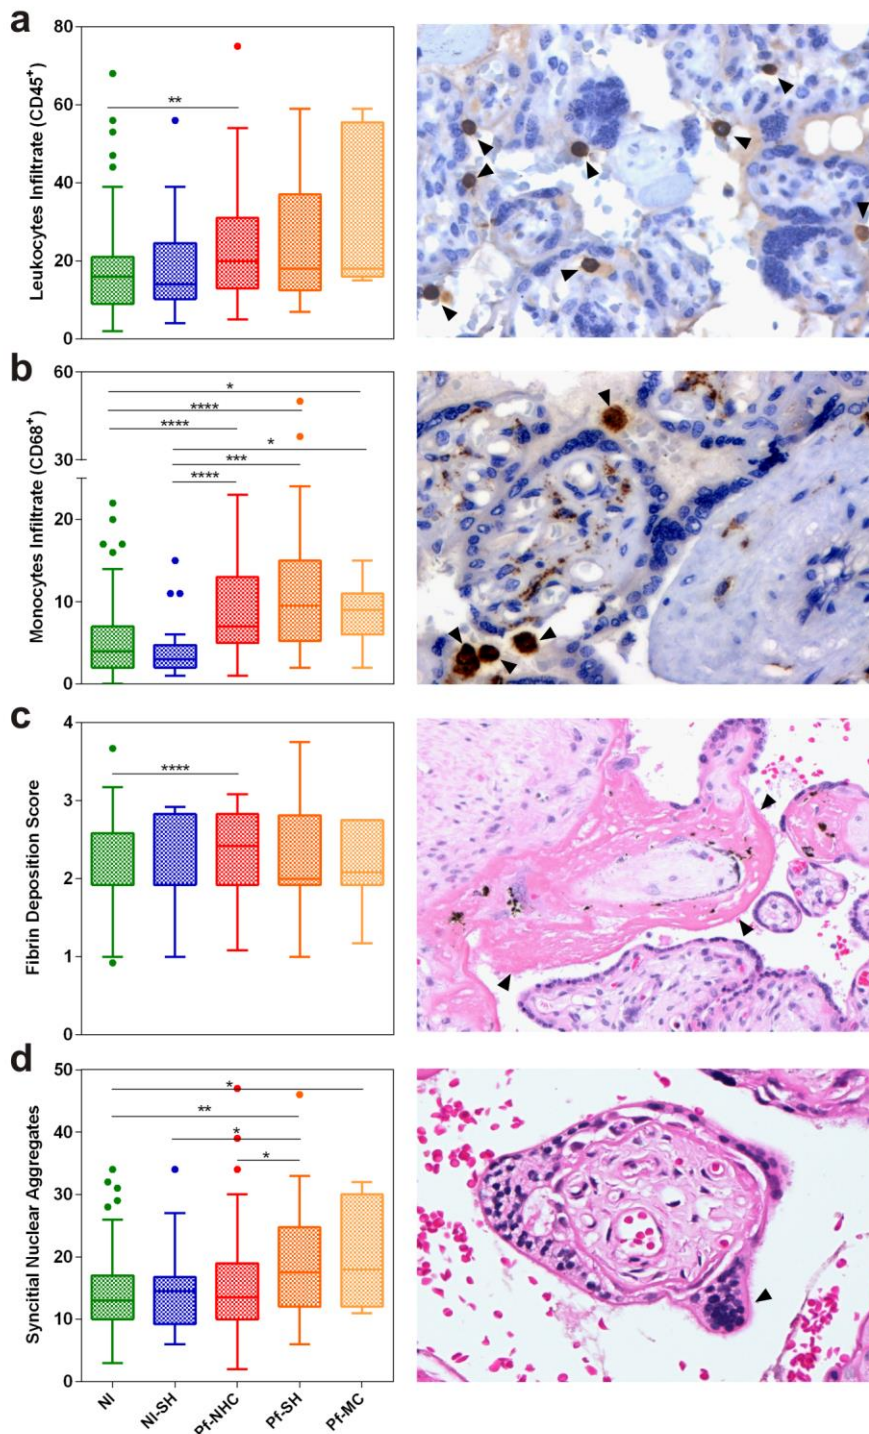

694

695 **a** Leukocytes (CD45<sup>+</sup>) number. **b** Monocytes (CD68<sup>+</sup>) number. **c** Fibrin deposition score. **d**

696 Syncytial nuclear aggregates. Images in each panel are only representative. Histopathological

697 parameters were evaluated by microscopy through H&E (fibrin deposition and syncytial nuclear

698 aggregates) and immunohistochemistry (leukocytes and monocytes) staining. NI – non-infected;

699 NI-SH – non-infected small head; Pf-NHC – *P. falciparum*-infected normal head circumference; Pf-

700 SH - *P. falciparum*-infected small; and, Pf-MC - *P. falciparum*-infected microcephaly. Data are  
701 represented as Tukey boxplots, the bottom and the top of the box are the first and third quartiles, the  
702 line inside the box is the median, and the whiskers represent the lowest and the highest data within  
703 1.5 IQR of the first and upper quartiles. The differences between each group were examined with  
704 Mann-Whitney rank sum tests, \*  $p \leq 0.05$ , \*\*  $p < 0.01$ , \*\*\*  $p < 0.001$  and \*\*\*\*  $p < 0.0001$ .

705

706

707

708

709

710

711

712

713

714

715

716

717

718

719

720

721

722

723

724

725

726

727 **Figure 5. Placental plasma levels of angiogenic factors and leptin from non- and *P.***  
 728 ***falciparum*-infected mothers according to newborns head circumference.**

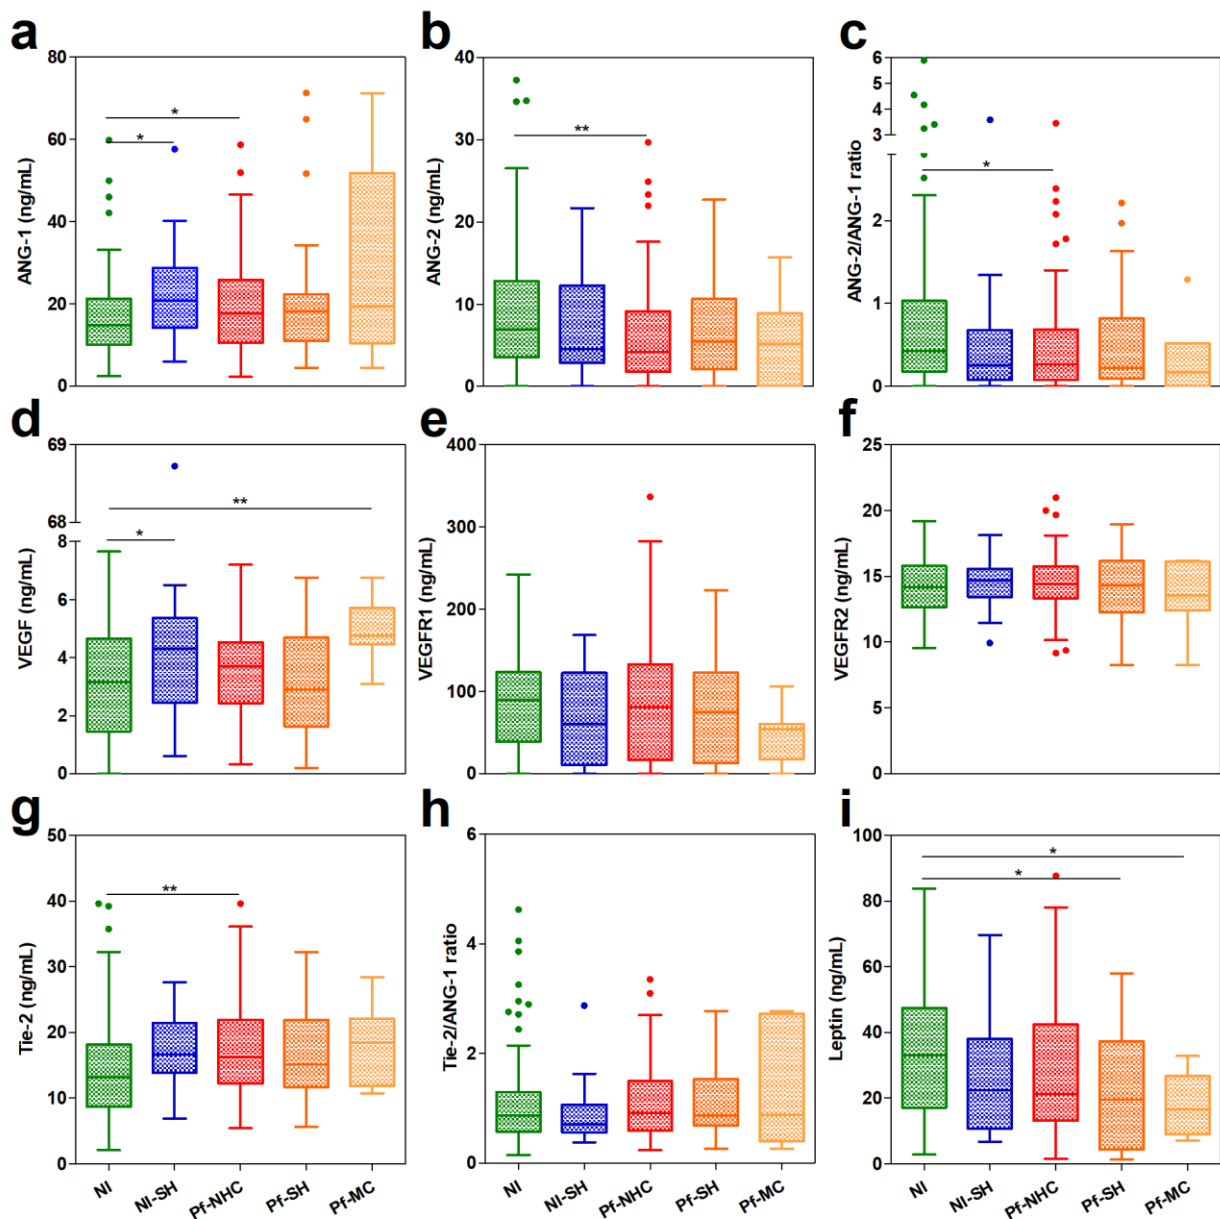

729  
 730 **a** Angiopoietin-1 (ANG-1). **b** Angiopoietin-2 (ANG-2). **c** Ratio ANG-2/ANG-1. **d** Vascular  
 731 endothelial growth factor (VEGF). **e** VEGF receptor-1 (VEGFR-1). **f** VEGF receptor-2 (VEGFR-2).  
 732 **g** TEK receptor tyrosine kinase (Tie-2). **h** Ratio Tie-2/ANG-2. **i** Leptin. All factors were measured  
 733 by ELISA. NI – non-infected; NI-SH – non-infected small head; Pf-NHC – *P. falciparum*-infected  
 734 normal head circumference; Pf-SH - *P. falciparum*-infected small; and, Pf-MC - *P. falciparum*-  
 735 infected microcephaly. Data are represented as Tukey boxplots, the bottom and the top of the box  
 736 are the first and third quartiles, the line inside the box is the median, and the whiskers represent the  
 737 lowest and the highest data within 1.5 IQR of the first and upper quartiles. The differences between  
 738 each group were examined with Mann-Whitney rank sum tests, \*  $p \leq 0.05$ , \*\*  $p < 0.01$ .

739 **Figure 6. Retrospective cohort study corroborates that malaria infection during pregnancy**  
 740 **impacts babies head circumference.**

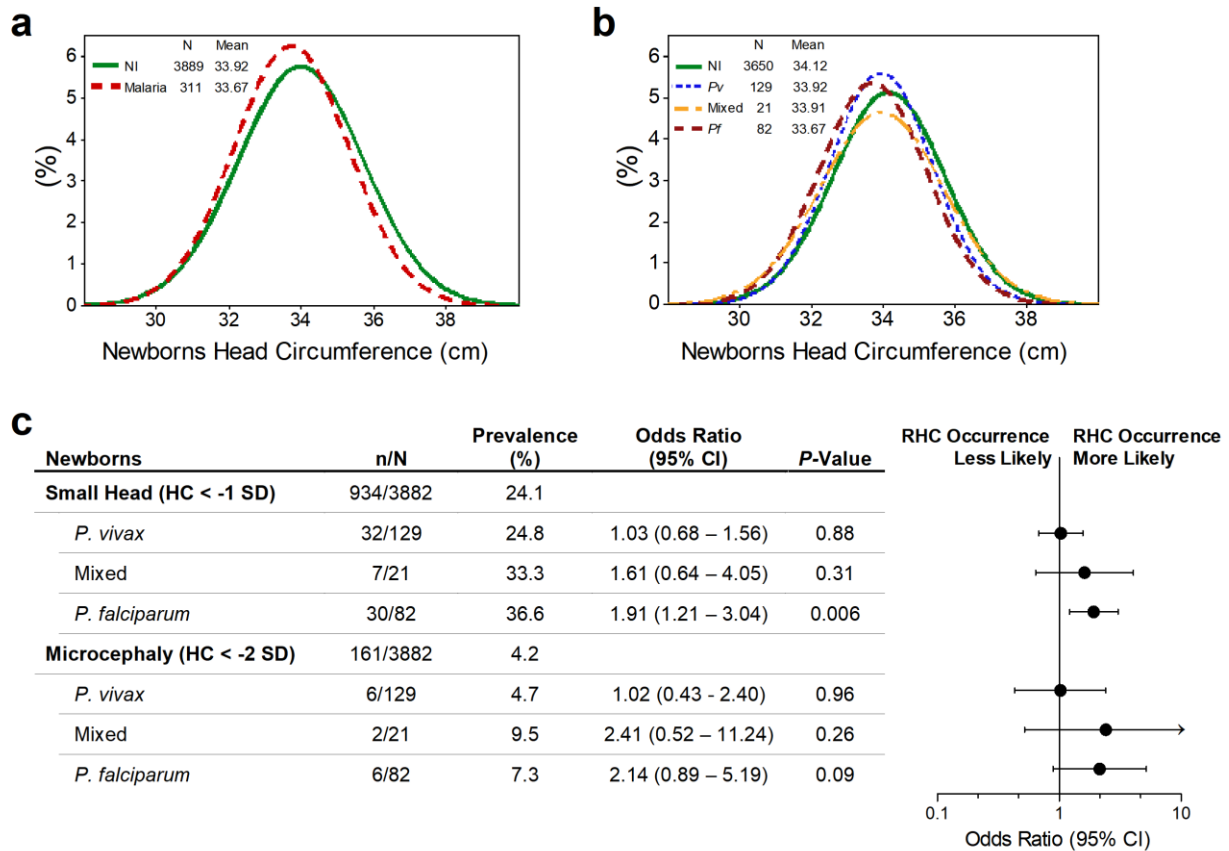

741

742 **a, b** Newborns head circumference frequency distribution in the PCS according to maternal  
 743 infection status: malaria- and non-infected (NI) mothers ( $p = 0.008$ ) (**a**), and NI, *Pv*, Mixed and *Pf*-  
 744 infected mothers after excluding LBW and preterm babies (NI vs *Pf*  $p = 0.015$ ) (**b**). The differences  
 745 in the frequency distributions between each group were examined with Mann-Whitney rank sum  
 746 tests. **c** Forest plot of the Odds Ratio of small head or microcephaly in babies born from women  
 747 infected during pregnancy compared to babies from non-infected women, according to *Plasmodium*  
 748 species. Mixed infection – *P. vivax*- and *P. falciparum*-infection occurring at the same time and/or  
 749 at different times during pregnancy. n/N - number of events by total number of individuals in each  
 750 group; CI - confidence interval; HC - head circumference; SD - standard deviation;  $p$ -Values were  
 751 estimated through multivariate logistic regression methods.

752

753 **Table 1. Infection characteristics in *P. falciparum*-infected pregnant women.**

|                                                           | <i>Pf</i> -NHC<br>(N=94) | <i>Pf</i> -SH<br>(N=30) | <i>p</i> -Value <sup>a</sup> | <i>Pf</i> -MC<br>(N=8) | <i>p</i> -Value <sup>b</sup> |
|-----------------------------------------------------------|--------------------------|-------------------------|------------------------------|------------------------|------------------------------|
| Infections per pregnancy, median (IQR)                    | 2.0 (1.0-3.0)            | 2.0 (1.0-2.0)           | 0.463                        | 1.0 (1.0-2.0)          | 0.116                        |
| Parasitemia of first infection, median (IQR) <sup>c</sup> | 1.2 (0.3-4.6)            | 3.8 (0.5-9.2)           | 0.053                        | 0.4 (0.2-1.8)          | 0.220                        |
| Gestational age at first infection                        |                          |                         |                              |                        |                              |
| Mean (SD)                                                 | 20.7 (10.5)              | 26.0 (8.1)              | 0.014                        | 27.6 (7.8)             | 0.064                        |
| Median (IQR)                                              | 19.0 (12.0-29.3)         | 25.5 (18.0-32.5)        |                              | 28.5 (19.8-34.3)       |                              |
| Placental Malaria, no. (%) <sup>d</sup>                   |                          |                         |                              |                        |                              |
| No                                                        | 29 (36)                  | 7 (30)                  | -                            | 1 (14)                 | -                            |
| Active Acute                                              | 8 (10)                   | 2 (8)                   | -                            | 0                      | -                            |
| Active Chronic                                            | 5 (6)                    | 2 (8)                   | -                            | 1 (14)                 | -                            |
| Past                                                      | 38 (48)                  | 13 (54)                 | -                            | 5 (72)                 | -                            |
| Hemozoin, no. (%) <sup>d, e</sup>                         |                          |                         |                              |                        |                              |
| No                                                        | 31 (39)                  | 8 (33)                  | -                            | 1 (14)                 | -                            |
| Mild                                                      | 32 (40)                  | 9 (38)                  | -                            | 4 (57)                 | -                            |
| Moderate                                                  | 15 (19)                  | 7 (29)                  | -                            | 2 (29)                 | -                            |
| Severe                                                    | 2 (2)                    | 0                       | -                            | 0                      | -                            |

754 N, number of individuals; *Pf*-NHC, *Plasmodium falciparum*-normal head circumference; *Pf*-SH,  
755 *Plasmodium falciparum*-small head; *Pf*-MC, *Plasmodium falciparum*-microcephaly; IQR,  
756 interquartile range; SD, standard deviation; no., number of events.

757 <sup>a</sup> Differences between *Pf*-NHC and *Pf*-SH groups were evaluated using Mann-Whitney rank sum  
758 tests.

759 <sup>b</sup> Differences between *Pf*-NHC and *Pf*-MC groups were evaluated using Mann-Whitney rank sum  
760 tests.

761 <sup>c</sup> Parasitemia was recorded in 82 *Pf*-NHC, 28 *Pf*-SH, and 7 *Pf*-MC. Values presented in 10<sup>3</sup> DNA  
762 copies.

763 <sup>d</sup> Placental malaria and Hemozoin was recorded in 80 *Pf*-NHC, 24 *Pf*-SH, and 7 *Pf*-MC.

764 <sup>e</sup> Hemozoin - Mild: focal presence in small amounts; Moderate: small spots or larger deposits in  
765 many locations; Severe: large amounts present widely.
